# Supplementary material for: Procalcitonin and lung ultrasound algorithm to diagnose severe pneumonia in critical paediatric patients (PROLUSP study). A randomised clinical trial
Source: Springer Nature journal article supplement (doi:10.1186/s12931-020-01476-z), 2020-10-08
Supplement: MOESM1 [file 18463588]

**Supplemental table 1.** Clinical Pulmonary Infection Score.

| <b>CPIS points</b>                           | <b>0</b>                       | <b>1</b>                    | <b>2</b>                                           |
|----------------------------------------------|--------------------------------|-----------------------------|----------------------------------------------------|
| <b>Tracheal secretions</b>                   | Rare                           | Abundant                    | Purulent                                           |
| <b>Chest X-ray</b>                           | No infiltrates                 | Diffuse infiltrate          | Localized infiltrate                               |
| <b>Temperature (°C)</b>                      | $\geq 36.5$ and $\leq 38.4$    | $\geq 38.4$ and $\leq 38.9$ | $\leq 36$ or $\geq 39$                             |
| <b>Leukocytes (per mm<sup>3</sup>)</b>       | $\geq 4,000$ and $\leq 11,000$ | $< 4,000$ or $> 11,000$     | $< 4,000$ or $> 11,000$ plus band forms $\geq 500$ |
| <b>PaO<sub>2</sub>/FiO<sub>2</sub> ratio</b> | $\geq 240$ or ARDS             | -                           | $\leq 240$ and no ARDS                             |
| <b>TA culture</b>                            | Negative                       | -                           | Positive                                           |

ARDS: Acute Respiratory Distress Syndrome. CPIS: Clinical Pulmonary Infection Score. TA: tracheal aspirate.
